# Supplementary figures and images for: Differences between Health and Non-Health Science Students in Lifestyle Habits, Perceived Stress and Psychological Well-Being: A Cross-Sectional Study
Source: MDPI journal article supplement (doi:10.3390/nu16050620), 2024-02-23

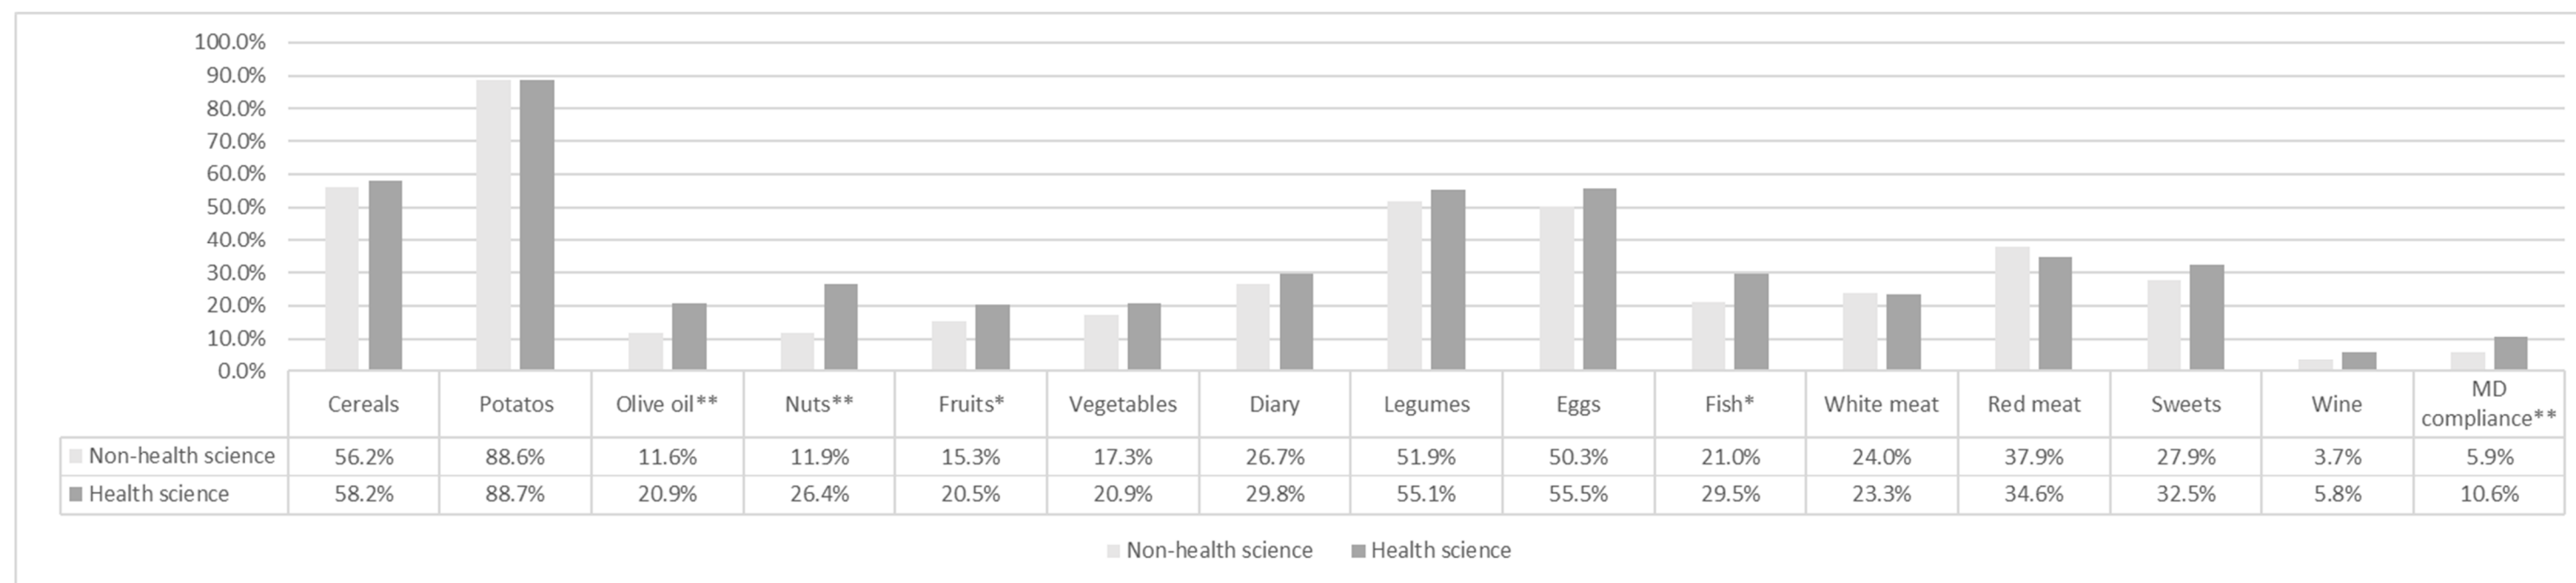

\*  $p < 0.05$ ; \*\*  $p < 0.001$

**Figure S1.** Mediterranean diet compliance between Health and Non-health science students.

Supplement: s1 [file s1]
